# Supplementary material
Source: PubMed Central journal article supplement (PMC4334472)
Supplement: Supp_Fig1.pdf [file Supp_Fig1.pdf]

## Supplementary Data

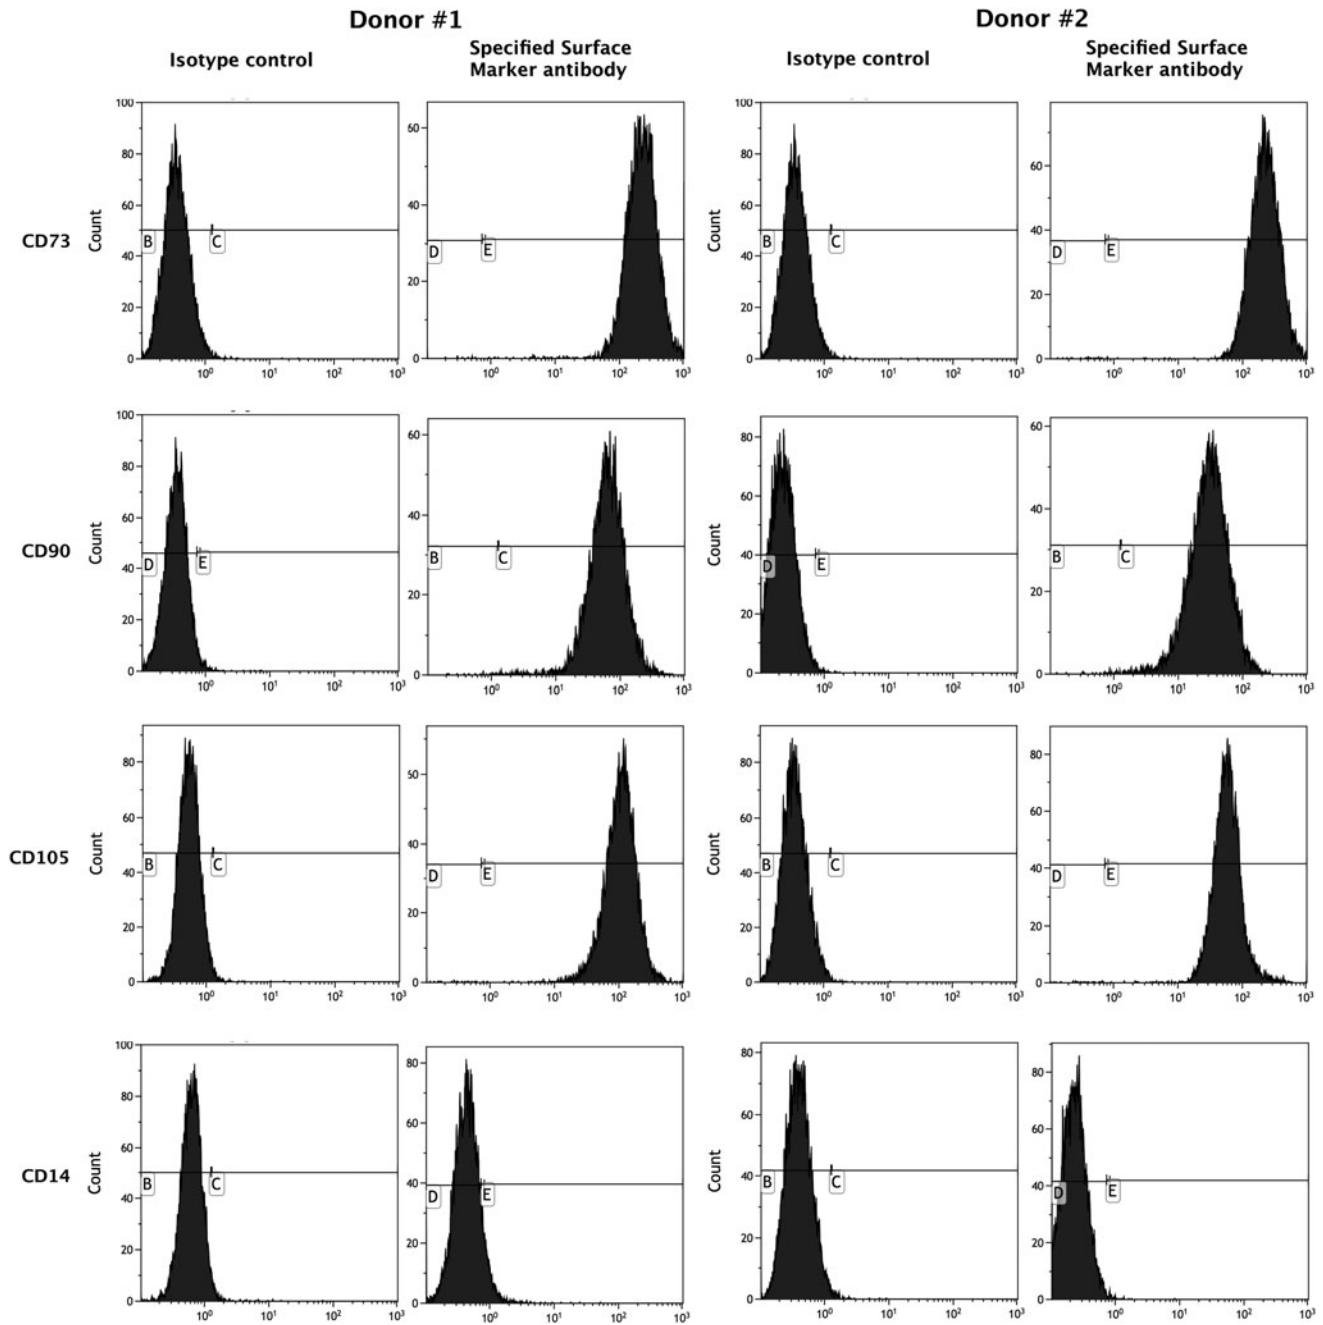

**SUPPLEMENTARY FIG. S1.** FACS analysis of the cell cultures presented as histograms. The graphs are separated into two columns—one for each donor culture. The columns are furthermore divided into two subcolumns with isotype controls on the *left*, and row specific surface marker antibody on the *right*.
