# Supplementary material
Source: PubMed Central journal article supplement (PMC4334472)

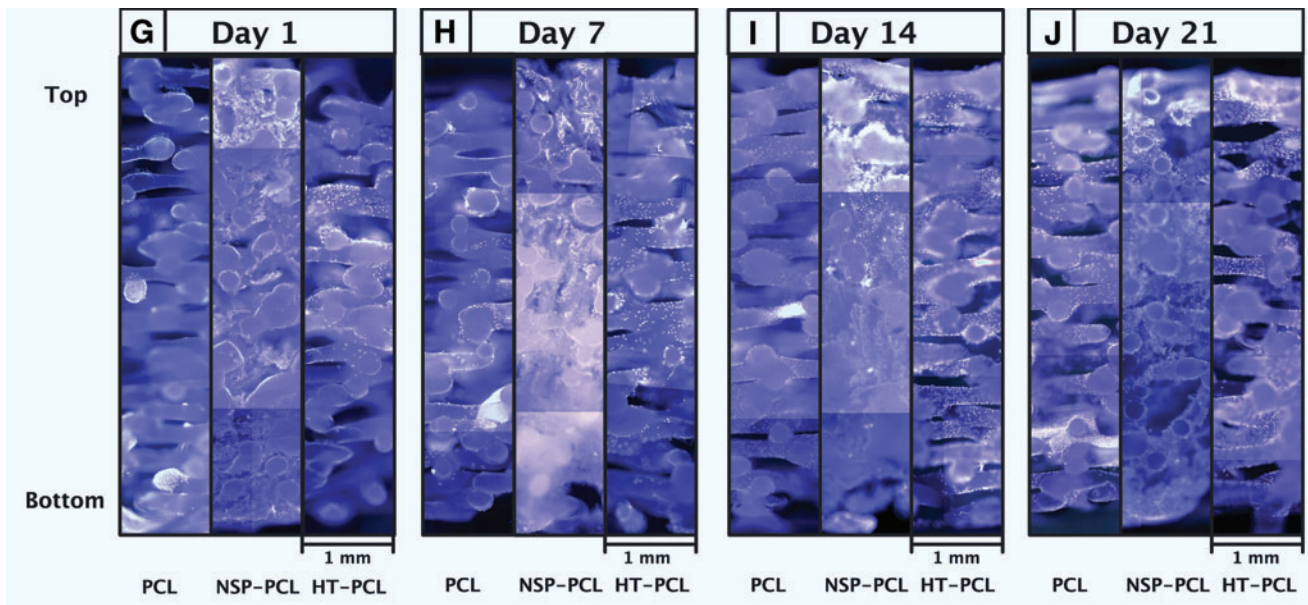

**SUPPLEMENTARY FIG. S2.** Unedited color image of the fluoroscopy collage in Figure 2G-J.

Supplement: Supp_Fig2.pdf [file Supp_Fig2.pdf]
